# Supplementary material
Source: PubMed Central journal article supplement (PMC4162310)
Supplement: NIHMS560309-supplement-2.pdf [file NIHMS560309-supplement-2.pdf]

**Supplementary Table 1: Group Characteristics for Participants Included in Primary Brain Imaging Analyses (N=763)**

| Variable*                                         | Sites (N=17) | Ranges Across Sites |           |           |           |            |           |           |           | Grand Mean and SD |      |      |            |      |      | Group Comparisons |         |        |
|---------------------------------------------------|--------------|---------------------|-----------|-----------|-----------|------------|-----------|-----------|-----------|-------------------|------|------|------------|------|------|-------------------|---------|--------|
|                                                   | n            | ASD (N=360)         |           |           |           | TC (N=403) |           |           |           | ASD (N=360)       |      |      | TC (N=403) |      |      | Mann-Whitney      |         |        |
|                                                   |              | Min                 | Max       | Mean      | SD        | Min        | Max       | Mean      | SD        | Sub n             | Mean | SD   | Sub n      | Mean | SD   | Z                 | U       | p      |
| Age at scan (years)                               | 17           | 7.0-18.0            | 11.8-58.0 | 9.9-26.6  | 1.1-14.9  | 6.4-18.0   | 12.0-48.0 | 10.2-25.5 | 1.0-9.4   | 360               | 16.3 | 7    | 403        | 16.3 | 7    | -0.534            | 70917.5 | 0.593  |
| Full IQ**                                         | 17           | 78-91               | 118-139   | 96-115    | 10-17     | 79-98      | 121-139   | 102-116   | 6-22      | 360               | 106  | 15   | 403        | 111  | 11   | -4.91             | 57620   | <.0001 |
| Verbal IQ                                         | 13           | 69-88               | 108-149   | 96-117    | 11-20     | 67-103     | 117-147   | 105-118   | 9-23      | 302               | 105  | 16   | 324        | 111  | 13   | -5.405            | 36706.5 | <.0001 |
| Performance IQ                                    | 13           | 64-89               | 112-149   | 98-113    | 11-19     | 67-97      | 120-137   | 98-111    | 8-22      | 302               | 106  | 15   | 324        | 108  | 12   | -1.678            | 47903.5 | 0.093  |
| ADI-R Scaled Scores                               | 12           | -                   | -         | -         | -         | -          | -         | -         | -         | 255               | -    | -    | -          | -    | -    | -                 | -       | -      |
| Social                                            | 12           | 7-14                | 23-30     | 18-24     | 4-7       | -          | -         | -         | -         | 255               | 20   | 5    | -          | -    | -    | -                 | -       | -      |
| Communication                                     | 12           | 4-15                | 20-26     | 14-19     | 3-6       | -          | -         | -         | -         | 255               | 16   | 4    | -          | -    | -    | -                 | -       | -      |
| RRB                                               | 12           | 0-4                 | 9-13      | 6-8       | 2-3       | -          | -         | -         | -         | 255               | 6    | 3    | -          | -    | -    | -                 | -       | -      |
| Onset                                             | 9            | 0-2                 | 5-5       | 3-4       | 1-2       | -          | -         | -         | -         | 201               | 3    | 1    | -          | -    | -    | -                 | -       | -      |
| ADOS (Lord et al. <sup>1</sup> ) Scaled Scores*** | 11           | -                   | -         | -         | -         | -          | -         | -         | -         | 261               | -    | -    | -          | -    | -    | -                 | -       | -      |
| Total Score (Social+Communication)                | 11           | 2-9                 | 16-22     | 9-14      | 3-4       | -          | -         | -         | -         | 261               | 12   | 7    | -          | -    | -    | -                 | -       | -      |
| Social                                            | 10           | 2-7                 | 10-14     | 7-10      | 2-4       | -          | -         | -         | -         | 239               | 8    | 3    | -          | -    | -    | -                 | -       | -      |
| Communication                                     | 10           | 0-2                 | 5-8       | 3-5       | 1-2       | -          | -         | -         | -         | 239               | 4    | 1    | -          | -    | -    | -                 | -       | -      |
| RRB                                               | 7            | 0-1                 | 3-8       | 1-3       | 1-2       | -          | -         | -         | -         | 187               | 2    | 2    | -          | -    | -    | -                 | -       | -      |
| ADOS (Gotham et al. <sup>2</sup> )****            | 9            | -                   | -         | -         | -         | -          | -         | -         | -         | 180               | -    | -    | -          | -    | -    | -                 | -       | -      |
| Social Affect & RRB Total                         | 8            | 2-10                | 17-27     | 11-16     | 2-5       | -          | -         | -         | -         | 167               | 12   | 5    | -          | -    | -    | -                 | -       | -      |
| Social Affect                                     | 8            | 2-7                 | 12-20     | 8-13      | 2-5       | -          | -         | -         | -         | 167               | 9    | 4    | -          | -    | -    | -                 | -       | -      |
| RRB                                               | 9            | 0-2                 | 5-8       | 2-4       | 1-2       | -          | -         | -         | -         | 180               | 3    | 2    | -          | -    | -    | -                 | -       | -      |
| Calibrated Severity Score                         | 8            | 1-6                 | 9-10      | 6-8       | 1-2       | -          | -         | -         | -         | 167               | 7    | 2    | -          | -    | -    | -                 | -       | -      |
| Mean FD (mm)                                      | 17           | 0.04-0.12           | 0.23-0.78 | 0.13-0.36 | 0.05-0.22 | 0.04-0.11  | 0.26-0.79 | 0.12-0.29 | 0.04-0.18 | 360               | 0.21 | 0.15 | 403        | 0.17 | 0.13 | -4.733            | 58154   | <.0001 |
|                                                   |              |                     |           |           |           |            |           |           |           |                   |      |      |            |      |      | Chi-Square        |         |        |
|                                                   | n            | Min                 | Max       |           |           | Min        | Max       |           |           | Sub n             | n    | %    | Sub n      | n    | %    | Value             | df      | p      |
| Sex (n males)                                     | 17           | 10                  | 64        | -         |           | 11         | 77        | -         |           | 360               | 360  | 100  | 403        | 403  | 100  | -                 | -       | -      |
| Handedness (n right handed)^                      | 17           | 8                   | 48        | -         |           | 10         | 72        | -         |           | 360               | 305  | 85   | 403        | 364  | 90   | 7.872             | 2       | 0.049  |
| Eye Status at R-fMRI (n eyes open)                | 17           | 0                   | 57        | -         |           | 0          | 64        | -         |           | 360               | 270  | 75   | 403        | 293  | 72   | 0.518             | 1       | 0.472  |
| DSM-IV-TR Diagnosis (n Autism)^^                  | 12           | 1                   | 48        | -         |           | -          | -         | -         |           | 279               | 198  | 71   | -          | -    | -    | -                 | -       | -      |
| Medication Status (n on meds)^^^                  | 13           | 1                   | 16        | -         |           | -          | -         | -         |           | 274               | 87   | 32   | -          | -    | -    | -                 | -       | -      |
| Comorbidity^^^^                                   | 2            | 18                  | 33        | -         |           | -          | -         | -         |           | 78                | 41   | 52   | -          | -    | -    | -                 | -       | -      |

Ranges of minima, maxima, means and standard deviations of the mean (SD) for continuous phenotypic variables and minima, maxima for categorical variables available for each group (Autism Spectrum Disorders [ASD] and Typical Controls [TC]), as well as group mean and SD for continuous variables and total and percentages for categorical variables. All measures are based on non imputed values to avoid a bias in representing the variance in their distributions. \*Only information for samples with a variable available for at least 75% of the participants in each diagnostic group per each site are included. \*\*Details on assessment instruments used per each sample's site are available on the ABIDE website ([http://fcon\\_1000.projects.nitrc.org/indi/abide/](http://fcon_1000.projects.nitrc.org/indi/abide/)). \*\*\*Modules 2, 3 and 4 were employed in 2, 10, and 10 sites, respectively. \*\*\*\*Developed for modules 1, 2, and 3 which were employed in 0, 3, and 8 sites, respectively. ^For 3 sites providing dimensional measures of handedness based on standard scales, we assigned right-handedness for any positive score > 0 and left handedness for negative scores, 0 values were defined as ambidextrous. ^^Six samples classified probands as having ASD but did not use specific DSM-IV-TR labels. ^^12 sites provided information on use of psychoactive medications within the month prior to the scan; 1 site provided medication use at any time within a year from enrollment in the study. 32% of the individuals with ASD for whom information was provided, used psychoactive medications. Medications typically used to target ADHD (e.g., stimulants) were the most frequent, followed by antidepressants and then by antipsychotics. ~ 60% of the individuals using medications discontinued medication 24 hours prior to the scan. ^^^52% of the individuals with ASD with available information on comorbidity carried at least one comorbid diagnosis. Of them, 34% had at least two comorbid diagnoses. ADI-R=Autism Diagnostic Interview-Revised; ADOS=Autism Diagnostic Observation Schedule; FD=Framewise Displacement; IQ=Intelligence Quotient; RRB=Restricted Repetitive Behaviors. Additional measures collected in less than 5 samples included Social Responsiveness Scale Raw Total (n=4 samples), Autism Quotient (n=1), Social Communication Questionnaire (n=1) and Body Mass Index (n=1). 1. Lord C, Risi S, Lambrecht L, Cook EH, Leventhal BL, DiLavore PC et al. The Autism Diagnostic Observation Schedule-Generic: A standard measure of social and communication deficits associated with the spectrum of autism. *Journal of Autism and Developmental Disorders* 2000; 30(3): 205-223. 2. Gotham K, Risi S, Pickles A, Lord C. The Autism Diagnostic Observation Schedule: revised algorithms for improved diagnostic validity. *Journal of Autism and Developmental Disorders* 2007; 37(4): 613-627.
