# Supplementary material
Source: PubMed Central journal article supplement (PMC4162310)
Supplement: NIHMS560309-supplement-6.pdf [file NIHMS560309-supplement-6.pdf]

**Supplementary Table 5: Group Differences on iFC for Lobar Divisions Based on Structural and Functional Parcellation Schemes**

| <b>Lobar Divisions HOA units</b>      | <b>Frontal</b>       |                    | <b>Temporal</b>      |                    | <b>Parietal</b>      |                    | <b>Occipital</b>     |                   | <b>Subcortical</b> |                    |
|---------------------------------------|----------------------|--------------------|----------------------|--------------------|----------------------|--------------------|----------------------|-------------------|--------------------|--------------------|
| <i>ASD vs. TC</i>                     | <i>Hypo</i>          | <i>Hyper</i>       | <i>Hypo</i>          | <i>Hyper</i>       | <i>Hypo</i>          | <i>Hyper</i>       | <i>Hypo</i>          | <i>Hyper</i>      | <i>Hypo</i>        | <i>Hyper</i>       |
|                                       | <i>n (%)</i>         |                    | <i>n (%)</i>         |                    | <i>n (%)</i>         |                    | <i>n (%)</i>         |                   | <i>n (%)</i>       |                    |
| <b>Frontal</b>                        | 58<br>(15%)          |                    |                      |                    |                      |                    |                      |                   |                    |                    |
| <b>Temporal</b>                       | 254<br>(24%)         |                    | 125<br>(18%)         |                    |                      |                    |                      |                   |                    |                    |
| <b>Parietal</b>                       | 52<br>(10%)          |                    | 177<br>(26%)         |                    | 20<br>(13%)          |                    |                      |                   |                    |                    |
| <b>Occipital</b>                      | 51<br>(11%)          |                    | 230<br>(38%)         |                    | 39<br>(14%)          |                    | 4<br>(3%)            |                   |                    |                    |
| <b>Subcortical</b>                    | 10<br>(3%)           | 10<br>(3%)         |                      | 12<br>(3%)         |                      | 13<br>(6%)         |                      | 6<br>(3%)         | 2<br>(3%)          |                    |
| <b>Total<br/>n (%)</b>                | <b>425<br/>(16%)</b> | <b>10<br/>(0%)</b> | <b>786<br/>(22%)</b> | <b>12<br/>(0%)</b> | <b>288<br/>(16%)</b> | <b>13<br/>(1%)</b> | <b>324<br/>(20%)</b> | <b>6<br/>(0%)</b> | <b>12<br/>(1%)</b> | <b>41<br/>(3%)</b> |
| <b>Lobar Divisions Crad-200 units</b> | <b>Frontal</b>       |                    | <b>Temporal</b>      |                    | <b>Parietal</b>      |                    | <b>Occipital</b>     |                   | <b>Subcortical</b> |                    |
| <i>ASD vs. TC</i>                     | <i>Hypo</i>          | <i>Hyper</i>       | <i>Hypo</i>          | <i>Hyper</i>       | <i>Hypo</i>          | <i>Hyper</i>       | <i>Hypo</i>          | <i>Hyper</i>      | <i>Hypo</i>        | <i>Hyper</i>       |
|                                       | <i>n (%)</i>         |                    | <i>n (%)</i>         |                    | <i>n (%)</i>         |                    | <i>n (%)</i>         |                   | <i>n (%)</i>       |                    |
| <b>Frontal</b>                        | 144<br>(7%)          |                    |                      |                    |                      |                    |                      |                   |                    |                    |
| <b>Temporal</b>                       | 321<br>(13%)         |                    | 61<br>(9%)           |                    |                      |                    |                      |                   |                    |                    |
| <b>Parietal</b>                       | 167<br>(7%)          | 1<br>(0%)          | 310<br>(23%)         |                    | 92<br>(15%)          |                    |                      |                   |                    |                    |
| <b>Occipital</b>                      | 41<br>(2%)           |                    | 218<br>(19%)         |                    | 58<br>(5%)           |                    | 21<br>(5%)           |                   |                    |                    |
| <b>Subcortical</b>                    | 10<br>(1%)           | 16<br>(2%)         | 1<br>(0%)            | 17<br>(4%)         |                      | 32<br>(8%)         |                      | 6<br>(2%)         |                    |                    |
| <b>Total<br/>n (%)</b>                | <b>683<br/>(7%)</b>  | <b>17<br/>(0%)</b> | <b>911<br/>(15%)</b> | <b>17<br/>(0%)</b> | <b>627<br/>(11%)</b> | <b>33<br/>(1%)</b> | <b>338<br/>(7%)</b>  | <b>6<br/>(0%)</b> | <b>11<br/>(1%)</b> | <b>71<br/>(4%)</b> |

For each lobar division of the parcellation units included in the structural Harvard Oxford Atlas (HOA) and in the Crad-200 atlas, we summarize the absolute number and percentage of node-to-node intrinsic functional connectivity (iFC) showing significant differences between individuals with Autism Spectrum Disorders (ASD) and Typical Controls (TC). Gray cells represent instances with absence of any significant iFC, blue cells represent ASD-related hypoconnectivity (Hypo: ASD<TC), red cells represent hyperconnectivity (Hyper: ASD>TC). The shades of blue and red decreased proportionally going from the highest percentage to the lowest (38 to 0%). Correction for multiple comparisons were based on False Discovery Rate,  $p < 0.05$ . See Figure 2 and Supplementary Table 4 for results based on functional divisions of the HOA parcellation scheme and functional Crad-200 atlas, respectively as well as Supplementary 6 for information regarding lobar and hemispheric divisions. See Supplementary Information. SM= Sensory Motor, Unimodal= Unimodal Association, Hetermodal= Hetermodal Association.
